# Supplementary material for: Leopard and spotted hyena densities in the Lake Mburo National Park, southwestern Uganda
Source: PeerJ. 2022 Jan 27;10:e12307. doi: 10.7717/peerj.12307 (PMC8801179; doi:10.7717/peerj.12307)
Supplement: Supplemental Information 8 [file peerj-10-12307-s008.xlsx]

## Sheet: Sheet1
Site number	UTM	X	Y
1	36S	281454	9932152
2	36S	280901	9930400
3	36S	281033	9927826
4	36S	279033	9926435
5	36S	277616	9927968
6	36S	278659	9930365
7	36S	279509	9932586
8	36S	265915	9924398
9	36S	266495	9926572
10	36S	268676	9928269
11	36S	269448	9931433
12	36S	270751	9934112
13	36S	274171	9932975
14	36S	276726	9934034
15	36S	279085	9935241
16	36S	278875	9937610
17	36S	279495	9939950
18	36S	280242	9941074
19	36S	276363	9938444
20	36S	274146	9936710
21	36S	272014	9935365
22	36S	274263	9930705
23	36S	275223	9928559
24	36S	272793	9927403
25	36S	272559	9929533
26	36S	271690	9925662
27	36S	271506	9922810
28	36S	275729	9926991
29	36S	281604	9934521
30	36S	282531	9933508
